# Supplementary material for: The COVID-19 pandemic: the effect on airway Management in non-COVID emergency patients
Source: Springer Nature journal article supplement (doi:10.1186/s12873-021-00491-7), 2021-08-28
Supplement: MOESM1 [file 19608104]

**Table S1.** Propensity score balance by standardized mean difference

| <b>Covariate</b>                         | <b>Before IPTW</b> | <b>After IPTW</b> |
|------------------------------------------|--------------------|-------------------|
| Age                                      | - 0.166            | 0.001             |
| Gender                                   | - 0.052            | 0.001             |
| Charlson comorbidity index               | - 0.196            | 0.001             |
| Respiratory rate                         | 0.052              | - 0.002           |
| Mean arterial pressure                   | 0.268              | 0.001             |
| SpO <sub>2</sub> /FiO <sub>2</sub> ratio | - 0.131            | 0.001             |

Abbreviations: IPTW, inverse probability of treatment weighted; SpO<sub>2</sub>/ FiO<sub>2</sub>, oxygen saturation/fraction of inspired oxygen.
